# Supplementary material
Source: PubMed Central journal article supplement (PMC2838558)
Supplement: 00925.2009_1.pdf [file 00925.2009_1.pdf]

**Online Data Supplements: Expanded Methods**

**I. *Boundary Conditions:***

Boundary conditions required for flow analysis were taken from a number of measured data bases since at present there is no single data source for all the required inputs.

*Inlet, Outlet and Left Ventricle Pressures:*  $P_A(t)$ ,  $P_V(t)$  and  $LVP(t)$  respectively, were taken from Hurst & Logue (6). The signals were modified for a specific heart rate by changing the diastolic time fraction ( $DTF$ , the period from minimal to maximal time derivative of  $LVP$  divided by the cardiac period (2)) taken from measured data (2). This modification is a close approximation for the complex relation between  $DTF$  and additional flow conditions (2). The signals amplitudes were modified as well: since the feed artery to the analyzed network is a distal (order 8) epicardial artery (rather than the coronary aortic outlet), the inlet pressure magnitude was scaled down to 100/70 mmHg in systole/diastole ((11); Fig. ODS-1A). Similarly, the outlet pressure (of the network's drain vein) was taken to follow aortic pressure waveform, but delayed so as to peak during aortic valve closure (16). The pressure magnitude was taken as 25/5 mmHg (11, 16).

*Myocardial Activation* (Fig. ODS-1B), lasting 0.26 seconds at endocardium (13), was taken to vary between 0 at diastole to 1 during peak activation. Depolarization was taken to initiate at the endocardium and propagate towards the epicardium at velocity of 50 cm/s (1) while repolarization propagates in the opposite direction at the same velocity.

*Sarcomere Stretch Ratio* ( $SSR$ ) has been observed to be highly coupled to ventricular volume (54, 60). Thus, the ventricular volume waveform (6) was used for the  $SSR$  waveform, subject to 5% elongation from early to end diastole (15), and 16% shortening

25 from end-diastole to end-systole (15, 17) as depicted in Fig. ODS-1C. Ventricular wall  
26 thickening was taken from measured data (4).

## 27 **II. Stochastic Reconstruction of the Coronary Network**

28 The reconstruction is based on morphometric data for porcine coronary vasculature (8-10).  
29 Briefly, arteries and veins are assigned orders ranging from 1 to 11 and from -1 to -12 in  
30 the arterial and venal networks, respectively. The terms “segment” and “element” are  
31 applied to a vessel portion between two vessel junctions and to a sequence of segments of  
32 the same order which are connected in series, respectively. Capillaries are also grouped,  
33 into those stemming from arterioles (Coa), venules (Cov) or other capillaries (Coo), and  
34 cross-connecting capillaries (Ccc).

35 **Microvascular Network:** The microvascular network reconstruction was carried out based  
36 on the morphometric data of Kassab et al. (8-10) regarding vessel lengths, vessel  
37 connectivity, and capillary branching pattern, and subject to two data-based constraints: i)  
38 the distance between arteriolar and venular domains (average of 510  $\mu\text{m}$ , (8)), and ii) the  
39 ratio between arteriolar and venular segments (roughly 1 to 2, (9, 10)). One arteriole and  
40 two venules were located 510  $\mu\text{m}$  apart. They were assigned order 1 and order -1,  
41 respectively. Arterial and venular capillaries (Coa and Cov) were attached to these  
42 corresponding vessels, according to connectivity data (9, 10) (see figure ODS-2A). The  
43 lengths of vessels were assigned according to the measured statistical data. Utilizing the  
44 branching patterns, Coo and Ccc were connected to the arterial and venular capillaries (Fig.  
45 ODS-2B). Subsequently, additional arterioles and venules were connected to the  
46 previously posed vessels, thus increasing the orders of the input and output vessels (Fig.  
47 ODS-2C). This process was iterated until the gaps between arteriolar and venular domains

48 were bridged by capillaries, resulting in a network fed by one order 3 arteriole and two  
49 order -3 venules. In Tables ODS-1 to ODS-4 the reconstructed capillary branching pattern,  
50 arterial and connectivity matrices, and lengths and diameters of each order were compared  
51 to the measured data (8-10). A student T-test showed no statistically significant differences  
52 between the data and reconstructed network.

53 **Arterial and Venous Trees:** The order of arteries to first penetrate the cardiac wall ranges  
54 between 6 and 8 (7). Hence, the feeding artery was chosen to be an order 8. The number of  
55 generations arising from this arterial element, and the order of each segment in the tree  
56 were assigned based on the segment-to-element data (10). The order of the most distal  
57 segments was set to 4, thus matching the order of the reconstructed microvascular inlet  
58 arteriole. The length of each segment in the tree was assigned to fit the statistical data (8-  
59 10), while maintaining monotonic reduction of diameters along the element. The venous  
60 tree was reconstructed in a similar manner.

61

### 62 **III. The Deformation Gradient Tensors**

63 The deformation gradient  $F$  is determined by the mapping of coordinates between two  
64 loading configurations. Specifically, the transition between stress-free (*sf* subscript) and un-  
65 tethered (*unt*) configurations, combined with tissue incompressibility, leads to (5):

66

$$\begin{aligned}
67 \quad \mathbf{F}_{sf \rightarrow unt}^{v/m} &= \begin{bmatrix} \frac{\Theta_0^{v/m} r_{sf}^{v/m, in}}{\pi r_{unt}^{v/m, in} \Lambda_{unt, sf}^{v/m}} & 0 & 0 \\ 0 & \frac{\pi r_{unt}^{v/m, in}}{\Theta_0^{v/m} r_{sf}^{v/m, in}} & 0 \\ 0 & 0 & \Lambda_{unt, sf}^{v/m} \end{bmatrix} \quad (\text{ODS 1})
\end{aligned}$$

68 Here the superscript v/m denotes the specific cylinder: either vessel wall (v) or  
69 myocardium (m).  $\Theta_0$  is the opening angle (Fig. 3),  $r^{in}$  is the cylinder internal radius, and  $\Lambda$   
70 is the axial stretch as defined in the main text. The deformation gradients associated with  
71 the transitions between un-tethered and unloaded (*unld*) configurations, and between  
72 unloaded and loaded configurations are:

$$\begin{aligned}
73 \quad \mathbf{F}_{unt \rightarrow unld}^{v/m} &= \begin{bmatrix} \frac{r_{unt}^{v/m, in}}{r_{unld}^{v/m, in} \Lambda_{unld, unt}^{v/m}} & 0 & 0 \\ 0 & \frac{r_{unld}^{v/m, in}}{r_{unt}^{v/m, in}} & 0 \\ 0 & 0 & \Lambda_{unld, unt}^{v/m} \end{bmatrix} \quad (\text{ODS 2})
\end{aligned}$$

$$\begin{aligned}
74 \quad \mathbf{F}_{unld \rightarrow load}^{v/m} &= \begin{bmatrix} \frac{r_{unld}^{v/m, in}}{r_{load}^{v/m, in} \lambda_z} & 0 & 0 \\ 0 & \frac{r_{load}^{v/m, in}}{r_{unld}^{v/m, in}} & 0 \\ 0 & 0 & \lambda_z \end{bmatrix} \quad (\text{ODS 3})
\end{aligned}$$

75 Here  $\lambda_z$ , the vessel dynamic axial stretch (see Appenix B), has the same level at both  
76 cylinders.

77

#### 78 **IV. Vessel and Myocardium Material laws**

79 Following previous studies, the description of the multiaxial material laws of vessel wall  
 80 (19) and of the passive and active myocardium (12) are based on pseudostrain energy  
 81 functions:

82

$$W_v = \frac{C_{v,1}}{2} (\exp(Q_v) - 1);$$

$$83 \quad W_{m,pas} = C_{m,1} (\exp(Q_m) - 1); \quad (ODS 4)$$

$$W_{m,act} = W_{m,pas} + C_{m,5} + C_{m,6}(I_1 - 3)(I_4 - 1) + C_{m,7}(I_1 - 3)^2 + C_{m,8}(I_4 - 1)^2 + C_{m,9}(I_1 - 3) + C_{m,10}(I_4 - 1)$$

84 where v, m pas and act subscripts denote vessel, myocardium passive and active,  
 85 respectively,  $I_1$  and  $I_4$  are the first and fourth strain invariants respectively, and

$$86 \quad Q_v = C_{v,2}E_{\Theta\Theta}^2 + C_{v,3}E_{ZZ}^2 + C_{v,4}E_{RR}^2 + 2(C_{v,5}E_{\Theta\Theta}E_{ZZ} + C_{v,6}E_{ZZ}E_{RR} + C_{v,7}E_{\Theta\Theta}E_{RR}) \quad (ODS 4a)$$

$$Q_m = C_{m,2}(I_1 - 3)^2 + C_{m,3}(I_1 - 3)(I_4 - 1) + C_{m,4}(I_4 - 1)^2$$

87  $E_{ii}$  are the components of the Green-Lagrange strain tensor, and  $C_{i,j}$  are specimen-  
 88 dependent parametrs which were previously estimated from data for vessel (19) and for  
 89 myocardium (12).

90

#### 91 **V. Determining the Stress-Free Configuration**

92 To derive the stress-free configuration from the vessel cast (input) one, the internal and  
 93 external radii of both cylinders (vessel wall and myocardium) at the three unknown  
 94 configurations (unloaded, un-tethered and stress-free) are required. In addition to these 12  
 95 unknowns, 3 axial stretches need to be determined: the stretches of both vessel wall and  
 96 myocardium due to closure of the opening angle ( $\Lambda_{unt,sf}^v$  and  $\Lambda_{unt,sf}^m$ , respectively), and the

97 myocardium stretch due to tethering,  $\Lambda_{untl,unt}^m$ . The vessels' tethering stretch  $\Lambda_{untl,unt}^v$  is a  
98 measured input. Hence the total number of unknowns is 15.

99         The cast internal and external radii are known from the data (3, 8-10, 14, 18).  
100 Hence, in each unknown configuration and for each tissue (vessel and myocardium), for  
101 each given internal radius the incompressibility condition (Eq. B2 in Appendix B) yields  
102 the corresponding external one. Additionally, the assumption of common interface between  
103 cylinders at each of the above three configurations eliminates three more unknowns. Thus  
104 the number of unknowns is reduced from 15 to 6 (i.e., the vessel internal radii in stress-free,  
105 un-tethered and unloaded configurations;  $r_{sf}^{v,in}$ ,  $r_{unt}^{v,in}$  and  $r_{untl}^{v,in}$ , respectively, and the three  
106 unknown axial stretches listed above).

#### 107 **VI. Computational Scheme for Flow Analysis:**

108 The solution of the ODE system described by Eqs. 1 and D1 in the main text must satisfy  
109 periodicity condition. This was fulfilled using the shooting method, i.e., after an initial  
110 guess of the intravascular pressure in each vessel, the numerical scheme was carried out for  
111 several cardiac cycles until solutions at consecutive cycles converged to within preset  
112 tolerance. This tolerance was set as follows: the maximum allowed pressure difference (at  
113 any of the vessels) between the beginning and the end of a cardiac cycle should be <0.1  
114 mmHg. Numerical accuracy of the final solution was ascertained based on the criteria that  
115 the maximum difference between total flows into the feeding artery and out of its draining  
116 vein during a cardiac cycle was <5% of the total inflow.

117  
118

119 **REFERENCES**

- 120 1. **Brugada J, Brugada P, Boersma L, Mont L, Kirchhof C, Wellens HJ, and**  
121 **Allessie MA.** On the mechanisms of ventricular tachycardia acceleration during  
122 programmed electrical stimulation. *Circulation* 83: 1621-1629, 1991.
- 123 2. **Fokkema DS, VanTeeffelen JW, Dekker S, Vergroesen I, Reitsma JB, and**  
124 **Spaan JA.** Diastolic time fraction as a determinant of subendocardial perfusion. *Am J*  
125 *Physiol Heart Circ Physiol* 288: H2450-2456, 2005.
- 126 3. **Guo X and Kassab GS.** Distribution of stress and strain along the porcine aorta and  
127 coronary arterial tree. *Am J Physiol Heart Circ Physiol* 286: H2361-2368, 2004.
- 128 4. **Hartley CJ, Latson LA, Michael LH, Seidel CL, Lewis RM, and Entman ML.**  
129 Doppler measurement of myocardial thickening with a single epicardial transducer. *Am J*  
130 *Physiol* 245: H1066-1072, 1983.
- 131 5. **Humphrey JD.** *Cardiovascular solid mechanics: cells, tissues, and organs.* New  
132 York: Springer, 2002.
- 133 6. **Hurst JW and Logue RB.** *The Heart, Arteries, and Veins.* New York: McGraw-  
134 Hill, 1970, p. 77.
- 135 7. **Kaimovitz B, Lanir Y, and Kassab GS.** Large-scale 3-D geometric reconstruction  
136 of the porcine coronary arterial vasculature based on detailed anatomical data. *Ann Biomed*  
137 *Eng* 33: 1517-1535, 2005.
- 138 8. **Kassab GS and Fung YC.** Topology and dimensions of pig coronary capillary  
139 network. *Am J Physiol* 267: H319-325, 1994.
- 140 9. **Kassab GS, Lin DH, and Fung YC.** Morphometry of pig coronary venous system.  
141 *Am J Physiol* 267: H2100-2113, 1994.
- 142 10. **Kassab GS, Rider CA, Tang NJ, and Fung YC.** Morphometry of pig coronary  
143 arterial trees. *Am J Physiol* 265: H350-365, 1993.
- 144 11. **Klassen GA, Armour JA, and Garner JB.** Coronary circulatory pressure  
145 gradients. *Can J Physiol Pharmacol* 65: 520-531, 1987.
- 146 12. **Lin DH and Yin FC.** A multiaxial constitutive law for mammalian left ventricular  
147 myocardium in steady-state barium contracture or tetanus. *J Biomech Eng* 120: 504-517,  
148 1998.
- 149 13. **Nevo E and Lanir Y.** Parameter Estimation of Left Ventricle Performance.  
150 *Computers in Cardiology*, 1989, p. 251-254.
- 151 14. **Spaan JA.** *Coronary blood flow: mechanics, distribution, and control.* Dordrecht:  
152 Kluwer, 1991.
- 153 15. **Stevens C and Hunter PJ.** Sarcomere length changes in a 3D mathematical model  
154 of the pig ventricles. *Prog Biophys Mol Biol* 82: 229-241, 2003.
- 155 16. **Tillmanns H, Steinhausen M, Leinberger H, Thederan H, and Kubler W.**  
156 Pressure measurements in the terminal vascular bed of the epimyocardium of rats and cats.  
157 *Circ Res* 49: 1202-1211, 1981.
- 158 17. **Vis MA, Sipkema P, and Westerhof N.** Modeling pressure-area relations of  
159 coronary blood vessels embedded in cardiac muscle in diastole and systole. *Am J Physiol*  
160 268: H2531-2543, 1995.
- 161 18. **Vis MA, Sipkema P, and Westerhof N.** Modeling pressure-flow relations in  
162 cardiac muscle in diastole and systole. *Am J Physiol* 272: H1516-1526, 1997.

163 19. **Wang C, Garcia M, Lu X, Lanir Y, and Kassab GS.** Three-dimensional  
164 mechanical properties of porcine coronary arteries: a validated two-layer model. *Am J*  
165 *Physiol Heart Circ Physiol* 291: H1200-1209, 2006.  
166  
167  
168  
169



170 **FIGURE LEGENDS**

171

172 **Figure ODS-1:** Model input boundary conditions. A) Left-ventricle (LVP (t), solid),  
173 feeding ( $P_A(t)$ , dash) and draining ( $P_V(t)$ , dots) pressure signals, under heart rate of 120  
174 beats per minute. X-axis - time (in seconds), starting with endocardial activation. Y-axis -  
175 pressure (in mmHg, data taken from reference (6) and modified following (2, 11, 16)). B)  
176 Activation (13) at subepicardium (dash-dot) and subendocardium (solid). Time difference  
177 between the two signals is due to the finite velocity of activation propagation (1). C)  
178 Sarcomere stretch ratio (SSR(t), dash), reconstructed from LV volume (6), and  
179 myocardium wall thickening ((4), solid).

180

181 **Figure ODS-2:** A schematic of steps of the microvascular network reconstruction. A) One  
182 order 1 and two order -1 segments are located  $510 \mu\text{m}$  apart, and Coa and Cov capillaries  
183 are added. B) Coo and Ccc capillaries are added while preserving branching pattern ratio.  
184 C) Arterioles and venules are added to enable bridging the gap between domains.

185 **Table ODS-1: Capillary branching patterns.** Comparison between reconstructed network  
 186 and Kassab et al. (8) statistical data.

| Junction Pattern | Data | Reconstructed Network |
|------------------|------|-----------------------|
| T                | 0.2  | 0.19                  |
| Y                | 0.21 | 0.22                  |
| H                | 0.53 | 0.53                  |
| Hp               | 0.06 | 0.06                  |

187  
 188  
 189

190 **Table ODS-2: Reconstructed arteriolar connectivity matrix.** Comparison between  
 191 reconstructed network and Kassab et al. (10) statistical data (in brackets).

| Daughter Order | Mother Order |          |          |
|----------------|--------------|----------|----------|
|                | 1            | 2        | 3        |
| 0              | 3 (3.2)      | 0 (0.67) | 0 (0.15) |
| 1              | 0 (0.14)     | 2 (2.04) | 1 (0.63) |
| 2              |              | 0 (0.09) | 3 (2.24) |
| 3              |              |          | 0 (0.07) |

192  
 193  
 194

195 **Table ODS-3: Reconstructed venular connectivity matrix.** Comparison between  
 196 reconstructed network and Kassab et al. (9) statistical data (in brackets).

| Daughter Order | Mother Order |          |          |
|----------------|--------------|----------|----------|
|                | -1           | -2       | -3       |
| 0              | 2.7 (2.56)   | 0 (0.42) | 0 (0.35) |
| -1             | 0 (0.105)    | 2 (2.47) | 1 (0.77) |
| -2             |              | 0 (0.11) | 3 (2.44) |
| -3             |              |          | 0 (0.07) |

197

198 **Table ODS-4: The Vessels' lengths and diameters: Comparison between reconstructed**  
 199 *microvascular network and data (8-10). Asterisks stand for arterioles' diameters which*  
 200 *were altered according to their intramural location (see Appendix B).*

| Vessel Type                       | Data                            |             | Reconstructed Network |             | p-value<br>(reconstructed<br>vs. data) |
|-----------------------------------|---------------------------------|-------------|-----------------------|-------------|----------------------------------------|
|                                   | n                               | Mean (SD)   | n                     | Mean (SD)   |                                        |
|                                   | <b>Segment Length (microns)</b> |             |                       |             |                                        |
| Order 3                           | 177                             | 72 (49)     | 3                     | 70.4 (33.7) | 0.47                                   |
| Order 2                           | 326                             | 72 (45)     | 3                     | 75.5 (35.5) | 0.44                                   |
| Order 1                           | 506                             | 56 (38)     | 14                    | 58.8 (39.0) | 0.40                                   |
| Order -1                          | 251                             | 51 (41)     | 19                    | 49.5 (29.0) | 0.42                                   |
| Order -2                          | 313                             | 56 (41)     | 8                     | 55.4 (33.4) | 0.48                                   |
| Order -3                          | 263                             | 63 (43)     | 4                     | 66.5 (34.1) | 0.43                                   |
| Coa                               | 222                             | 52 (32.3)   | 21                    | 48.5 (30.9) | 0.31                                   |
| Cov                               | 34                              | 45 (30.5)   | 33                    | 43.7 (19.8) | 0.42                                   |
| Ccc                               | 161                             | 21.1 (15.5) | 20                    | 20.2 (6.0)  | 0.31                                   |
| Coo                               | 86                              | 54.5 (43)   | 49                    | 56.8 (25.6) | 0.35                                   |
| <b>Segment Diameter (microns)</b> |                                 |             |                       |             |                                        |
| Order 3                           | 266                             | 18.7 (2.6)  | 3                     | 18.4 (1.0)* | 0.34                                   |
| Order 2                           | 539                             | 13.0 (1.7)  | 3                     | 13.2 (0.8)* | 0.38                                   |
| Order 1                           | 835                             | 9.2 (0.94)  | 14                    | 9.1 (0.5)*  | 0.19                                   |
| Order -1                          | 251                             | 10.8 (1.7)  | 19                    | 11.1 (1.0)  | 0.14                                   |
| Order -2                          | 313                             | 17.6 (3.0)  | 8                     | 17.1 (1.8)  | 0.24                                   |
| Order -3                          | 263                             | 30 (4.3)    | 4                     | 29.4 (3.9)  | 0.38                                   |
| Coa                               | 222                             | 6.2 (1.1)   | 21                    | 6.1 (0.6)   | 0.35                                   |
| Cov                               | 34                              | 7.0 (1.2)   | 33                    | 6.9 (0.7)   | 0.36                                   |
| Ccc                               | 161                             | 5.5 (1.2)   | 20                    | 5.5 (0.8)   | 0.44                                   |
| Coo                               | 86                              | 5.7 (1.4)   | 49                    | 5.6 (0.7)   | 0.22                                   |

201

202

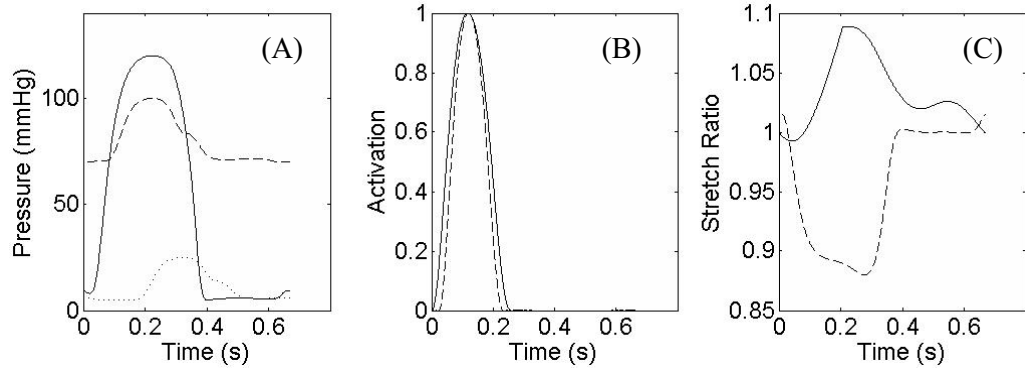

**Figure ODS-1**

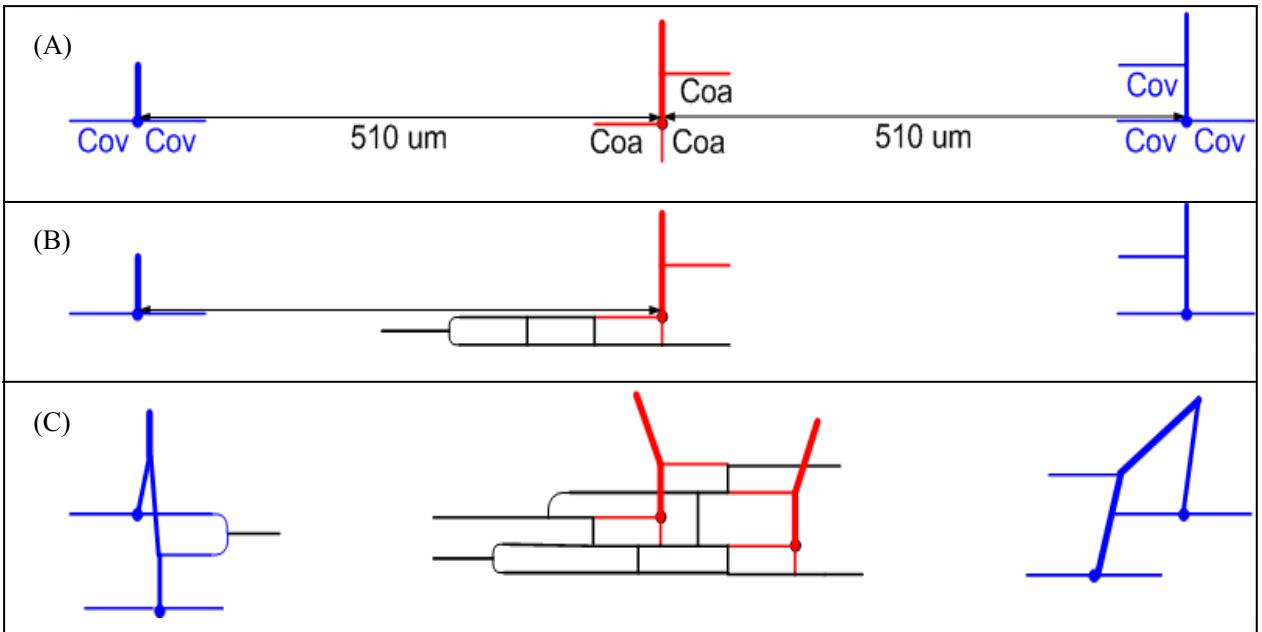

Figure ODS-2
